# Supplementary material for: Structural Determinants of Intimate Partner Violence in Afghanistan: Unequal Risks for Women in Polygamous and Monogamous Unions
Source: Research Square preprint supplement (doi:10.21203/rs.3.rs-7848549/v1), 2025-11-06
Supplement: Supplementary file 1 [file d3891fed28244a93a0aad6b0.docx]

| **Table S 1.** Missing values report (N= 21,324) | | | | | | | |
| --- | --- | --- | --- | --- | --- | --- | --- |
| Variable | Obs=. | Obs>. | Obs<. | Unique values | Min | Max | Percentage |
| Emotional IPV | 20 |  | 21,304 | 2 | 0 | 1 | 0.1% |
| Sexual IPV | 51 |  | 21,273 | 2 | 0 | 1 | 0.2% |
| Physical IPV | 20 |  | 21,304 | 2 | 0 | 1 | 0.1% |
| Any IPV | 24 |  | 21,300 | 2 | 0 | 1 | 0.1% |
| IPV justification | 1,925 |  | 19,399 | 3 | 1 | 3 | 9.0% |
| Husband drinks alcohol | 208 |  | 21,116 | 4 | 0 | 3 | 1.0% |
| Work status | 69 |  | 21,255 | 2 | 0 | 1 | 0.3% |
| Asset ownership | 208 |  | 21,116 | 3 | 1 | 3 | 1.0% |
| Husband education | 39 |  | 21,285 | 2 | 0 | 1 | 0.2% |
| Comparison of Partner’s Education | 1,122 |  | 20,202 | 2 | 0 | 1 | 5.3% |
| Ethnicity | 33 |  | 21,291 | 5 | 1 | 5 | 0.2% |
| *Note: 1.* This report is based on “misstable summarize” command in Stata | | | | | | | |

| **Table S 2.** Multiple imputation chained equations (MICE) results | | | | |
| --- | --- | --- | --- | --- |
| Multivariate imputation Imputations = 5  Chained equations added = 5  Imputed: m=1 through m=5 updated = 0  Initialization: monotone Iterations = 50  burn-in = 5 | | | | |
| **Variable** | **Complete** | **Incomplete** | **Imputed** | **Total** | |
| Emotional IPV | 21304 | 20 | 20 | 21324 | |
| Sexual IPV | 21273 | 51 | 51 | 21324 | |
| Physical IPV | 21304 | 20 | 20 | 21324 | |
| Any IPV | 21300 | 24 | 24 | 21324 | |
| IPV justification | 20202 | 1122 | 1122 | 21324 | |
| Husband drinks alcohol | 21255 | 69 | 69 | 21324 | |
| Work status | 21285 | 39 | 39 | 21324 | |
| Asset ownership | 19399 | 1925 | 1925 | 21324 | |
| Husband education | 21116 | 208 | 208 | 21324 | |
| Comparison of Partner’s Education | 21116 | 208 | 208 | 21324 | |
| Ethnicity | 21291 | 33 | 33 | 21324 | |
| *Note: 2.* Complete + Incomplete = Total; Imputed is the minimum across m of the number of filled-in observations. Different imputation models were specified based on the variable type:   - Emotional, sexual, physical, any IPV, IPV justification, husband drinks alcohol, and work status: predictive mean matching. - Asset ownership, husband education, comparison of partner’s education, and ethnicity: ordered logistic regression   The imputation models incorporated predictor variables (current age, women’s autonomy, household wealth index, residency, IPV prevalence, conflict severity, controlling behavior, aggregated wealth, and aggregated wealth) to enhance imputation accuracy by leveraging their associations with missing data. (Auxiliary Variables). | | | | |

| **Table S 3.** Multicollinearity test using Variance Inflation Factors (VIFs) | | |
| --- | --- | --- |
| Variable | VIF | 1/VIF |
| Husband education | 3.51 | 0.285 |
| Comparison of Partner’s Education | 3.06 | 0.326 |
| Household wealth index | 1.97 | 0.507 |
| IPV prevalence | 1.63 | 0.615 |
| Residency | 1.61 | 0.622 |
| Women’s education | 1.6 | 0.625 |
| Aggregated wealth | 1.54 | 0.649 |
| Physical IPV | 1.49 | 0.671 |
| Conflict severity | 1.49 | 0.673 |
| Aggregated education | 1.43 | 0.698 |
| Aggregated IPV justification | 1.39 | 0.719 |
| Ethnicity | 1.32 | 0.755 |
| Controlling behavior | 1.29 | 0.776 |
| Sexual IPV | 1.19 | 0.838 |
| IPV justification | 1.17 | 0.852 |
| Women’s autonomy | 1.15 | 0.866 |
| Work status | 1.13 | 0.882 |
| Current age (in year) | 1.11 | 0.902 |
| Asset ownership | 1.1 | 0.909 |
| Rank among co-wives | 1.01 | 0.986 |
| Husband drinks alcohol | 1.01 | 0.988 |
| **Mean VIF** | **1.53** |  |
|  | | |

| **Table S 4.** Definition and measurement of variables | |
| --- | --- |
| **Variables** | **Definition and measurement** |
| Dependent variables | |
| Emotional IPV | This variable indicates the emotional violence’s experience of IPV by respondents, this was measured by three items on humiliation, threats, and insults. The respondents who answered “no” coded 0 and who responses “yes” coded 1. |
| Sexual IPV | It is a dichotomous variable, indicating the respondents’ sexual violence of IPV, it included three items on forced sex or unwanted sexual acts. Who response “Yes” codded 1 and who said “No” codded 0. |
| Physical IPV | This variable measured the respondents’ experience of physical violence in their intimate relationship 12 months preceding the interview, it included seven items, such as being pushed, slapped, kicked, or attacked. It was described as a dichotomous variable (1= Yes vs. No=0) |
| Any form of IPV | This variable is a dichotomous variable, generated from the three forms of IPV, which captures whether the respondent experienced at least one form of IPV (emotional, physical, or sexual), if the respondent experienced at least one type of IPV codded 1= Yes, otherwise codded 0 = No. |
| Independent variable |  |
| Rank among co-wives | This variable categorizes the position or order of a wife in a polygamous marriage as follows: the first wife refers to the woman who is the first to be married to the husband in a polygamous union; otherwise, she is the second or later-order wife. Only wife refers to a woman who is the only wife in a monogamous marriage. This variable was categorized as “1= First wife; 2=Second or later-order; 3=Only wife.” |
| Control variables |  |
| Community-level factors |  |
| Prevalenceof IPV (any form) | The prevalence of IPV refers to the percentage of ever-married women aged 15–49 who have experienced emotional, sexual, or physical forms of IPV. This measure was derived from the subnational map in the AFDHS final report, which presents provincial-level IPV rates. Each province was assigned an IPV prevalence score ranging from 1 (lower prevalence) to 5 (higher prevalence) based on these reported rates |
| Provincial Conflict severity | Conflict severity was assessed using a weighted index from the United Nations Office for the Coordination of Humanitarian Affairs (OCHA 2014). This humanitarian report presents the weighted indices of conflict for each province when the DHS data were collected. The index relies on three primary indicators: 1) civilian casualties directly caused by armed conflict, 2) the presence of landmines or unexploded ordnances, and 3) population displacement due to conflict. The variables were classified on a scale ranging from 1 (very low) to 5 (very high) |
| Place of residence | This variable quantifies the respondent's residential location, categorized as either urban (coded 1) or rural (coded 0). |
| Aggregated education | To capture the educational context, we aggregated individual women’s years of schooling across provinces. This variable represents the average level of education among women in a given province. Higher values correspond to provinces where women are, on average, better educated. |
| Aggregated IPV justification | This variable is derived from women’s attitudes toward IPV. Respondents were asked whether a husband is justified in beating his wife under specific circumstances (e.g., neglecting the children, refusing sex, or arguing). Individual responses were aggregated at the provincial level to create a composite measure that reflects the prevailing community norms regarding wife-beating. Higher values indicate greater acceptance of IPV within the community. |
| Aggregated wealth | Household wealth quintiles from DHS were aggregated to the provincial level, yielding an indicator of average wealth status across households within each province. This measure reflects the socioeconomic environment in which women reside. |
| Household-level factors |  |
| Husband’s education level | This variable quantifies the educational attainment of respondents' husbands, it categorized as: 0=no education, 1= primary, 2= secondary, and 3= higher education. . |
| Controlling behavior | Spousal controlling behavior was assessed through five items that inquired whether the husband demonstrated specific controlling actions, such as jealousy, accusations of infidelity, and restrictions on social interactions. Each item was coded as 0 for "No" and 1 for "Yes," while responses coded as 8 for "Don't know" were considered missing data. A continuous index was subsequently developed by calculating the mean of the five items, with higher values signifying greater levels of controlling behavior. |
| Household wealth index | A household’s cumulative living standard is measured compositely by the wealth index, which is evaluated in five categories (poorest = 1, poorer = 2, middle = 3, richer = 4, richest = 5). |
| Women asset ownership | Survey participants were presented with two inquiries regarding asset ownership. The questions aimed to ascertain whether respondents possessed a house independently or in conjunction with others. The response options were: 1- no ownership, 2- sole ownership, 3- joint ownership only, or 4- both sole and joint ownership. This classification was derived from queries concerning both house and land ownership, resulting in three categories: 1= non-owner, 2= exclusive owner, and 3= co-owner. |
| Husband/partner drinks alcohol | Regarding alcohol consumption, spouses were assigned a binary code: 1 if they consumed alcohol, and 0 if they did not |
| Comparison of Partner’s Education | The gap in educational attainment between the participant and their spouse was classified as 0 (equally educated), 1 (husband more educated), or 2 (wife more educated). |
| ***Individual-level factors*** |  |
| Women’s autonomy | In the 2015 AFDHS, female respondents were queried regarding decision-making across four domains of autonomy: personal healthcare, household purchases, visits to family or relatives, and the allocation of spousal earnings. These responses were subsequently utilized to construct a decision autonomy index, with aggregate scores ranging from 0 to 8. |
| Current age (in year) | The respondents’ age in the number of years (15-49) |
| Work status | Those who had a job during the interview coded 1 and those who were not working coded 0. |
| Women’s education attainment | The first moderator (W) used education, all women were asked about their highest educational level. This was categorized as 0 = no education, 1= primary education, and 2= higher education. |
| IPV justification | This variable indicates attitudes toward IPV among women in Afghanistan. Participants were asked if, in certain situations, a husband may become irritated or angry because of his wife's actions. Do you believe it is acceptable for a husband to strike or physically abuse his wife under the following circumstances?" 1) If she goes out without telling the husband, 2) if she neglects children, 3) if she argues with her husband, 4) if she refuses to have sex with her husband, and 5) if she burnt food. Responses to these five scenarios were constructed as composite variables: "Yes" (coded as 1) or "No" (coded as 0) |
| Ethnicity | This variable represents the respondent's ethnicity and includes the following categories: Pashtun = 1, Tajik = 2, Hazara = 3, Uzbek = 4, and Other = 5. |
